# Supplementary material for: New Ferulic Acid and Amino Acid Derivatives with Increased Cosmeceutical and Pharmaceutical Potential
Source: MDPI journal article supplement (doi:10.3390/pharmaceutics15010117), 2022-12-29

# New Ferulic Acid and Amino Acid Derivatives with Increased Cosmeceutical and Pharmaceutical Potential

Ewa Janus <sup>1,\*</sup>, Luan Ramalho Pinheiro <sup>1,2</sup>, Anna Nowak <sup>3</sup>, Edyta Kucharska <sup>1</sup>, Ewelina Świątek <sup>1</sup>, Natalia Podolak <sup>1</sup>, Magdalena Perużyńska <sup>4</sup>, Katarzyna Piotrowska <sup>5</sup>, Wiktoria Duchnik <sup>3</sup>, Łukasz Kucharski <sup>3</sup> and Adam Klimowicz <sup>3,\*</sup>

<sup>1</sup> Department of Chemical Organic Technology and Polymeric Materials, Faculty of Chemical Technology and Engineering, West Pomeranian University of Technology in Szczecin, Pulaski Ave. 10, 70-322 Szczecin, Poland

<sup>2</sup> Polytechnic Institute of PUC Minas, Pontifical Catholic University of Minas Gerais, Belo Horizonte 30535-901, Brazil

<sup>3</sup> Department of Cosmetic and Pharmaceutical Chemistry, Pomeranian Medical University in Szczecin, 70-111 Szczecin, Poland

<sup>4</sup> Department of Experimental & Clinical Pharmacology, Pomeranian Medical University in Szczecin, 70-111 Szczecin, Poland

<sup>5</sup> Department of Physiology, Pomeranian Medical University in Szczecin, 70-111 Szczecin, Poland

\* Correspondence: ejanus@zut.edu.pl (E.J.); adam.klimowicz@pum.edu.pl (A.K.)

## Table of contents:

|                                                                                                                                              |             |
|----------------------------------------------------------------------------------------------------------------------------------------------|-------------|
| S1. Copies of <sup>1</sup> H and <sup>13</sup> C NMR of ferulic acid                                                                         | page 1      |
| S2. Copies of <sup>1</sup> H NMR, <sup>13</sup> C NMR and <sup>1</sup> H- <sup>13</sup> C HMQC spectra of amino acid propyl esters ferulates | pages 2–6   |
| S3. FTIR spectra of ferulic acid and amino acid propyl esters ferulates                                                                      | pages 6–9   |
| S4. DSC curves for ferulic acid and amino acid propyl esters ferulates                                                                       | pages 10–11 |
| S5. Curves from thermogravimetric analysis of ferulic acid and amino acid propyl esters ferulates                                            | pages 12–13 |
| S6. Photographs of hydrogels and emulsions preparations                                                                                      | pages 14–15 |

## S1. Copies of $^1\text{H}$ and $^{13}\text{C}$ NMR spectra of ferulic acid

$^1\text{H}$  NMR spectrum of ferulic acid (400 MHz,  $\text{DMSO-}d_6$ )

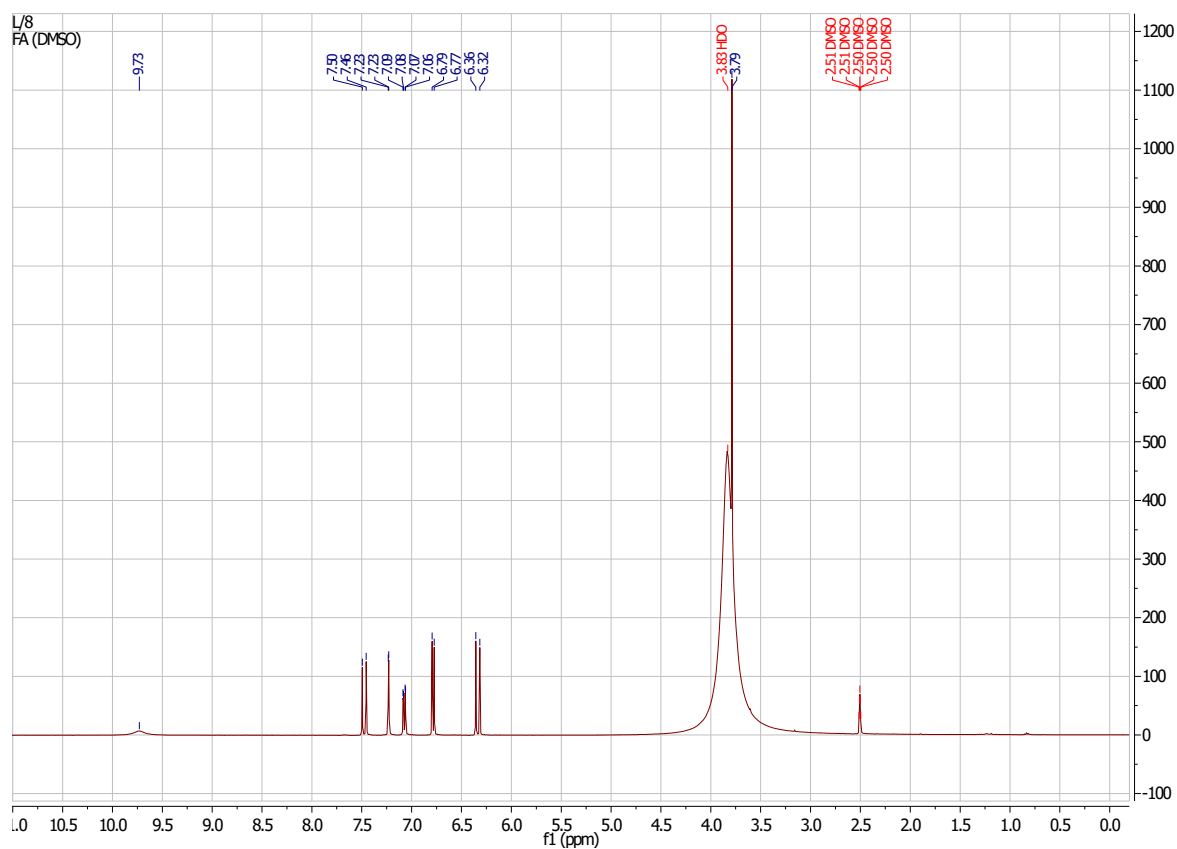

$^{13}\text{C}$  NMR spectrum of ferulic acid (101 MHz,  $\text{DMSO-}d_6$ )

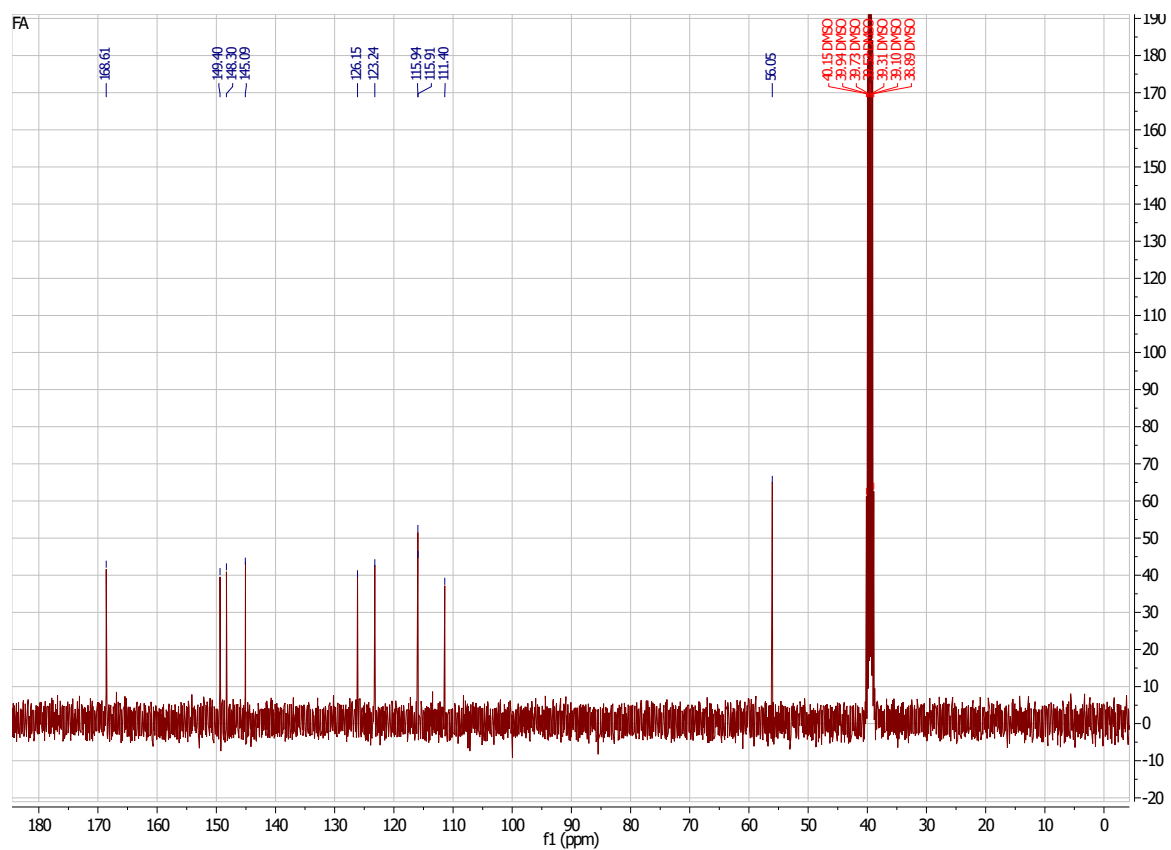

## S2. Copies of $^1\text{H}$ NMR, $^{13}\text{C}$ NMR and HMQC spectra of amino acid propyl esters ferulates

$^1\text{H}$  NMR spectrum of glycine propyl ester ferulate (400 MHz,  $\text{DMSO}-d_6$ )

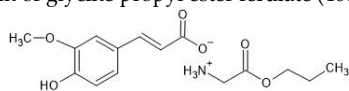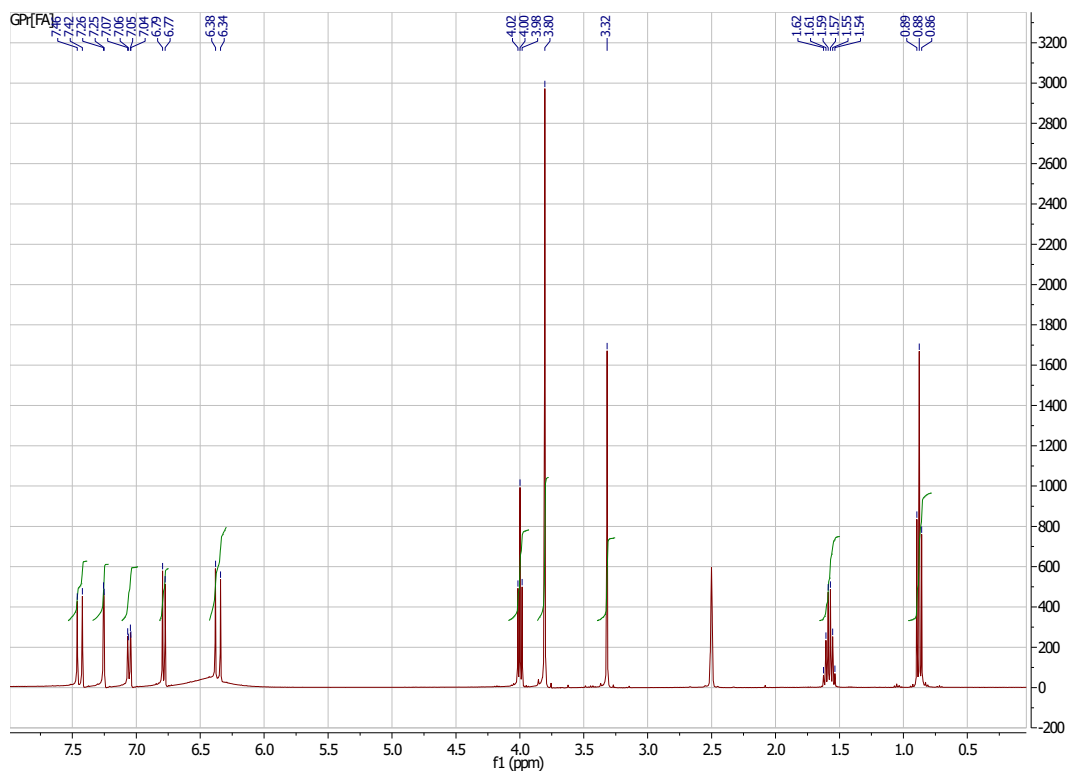

$^{13}\text{C}$  NMR spectrum of glycine propyl ester ferulate (101 MHz,  $\text{DMSO}-d_6$ )

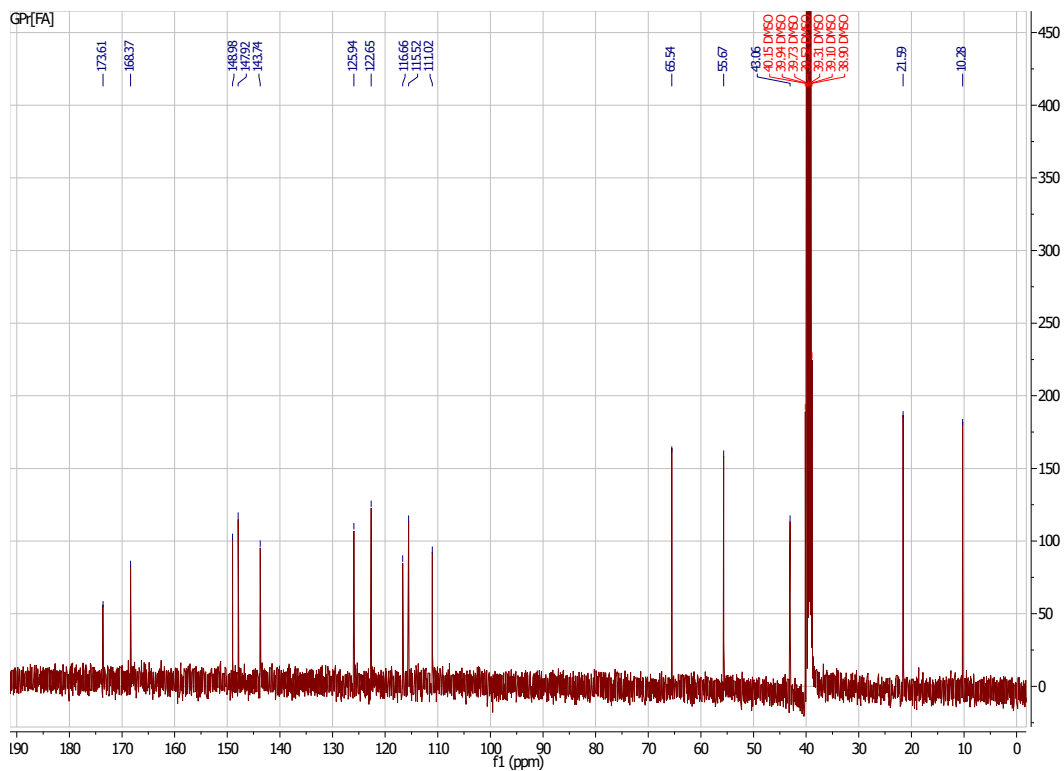

$^1\text{H}$ - $^{13}\text{C}$  HMQC spectrum of glycine propyl ester ferulate

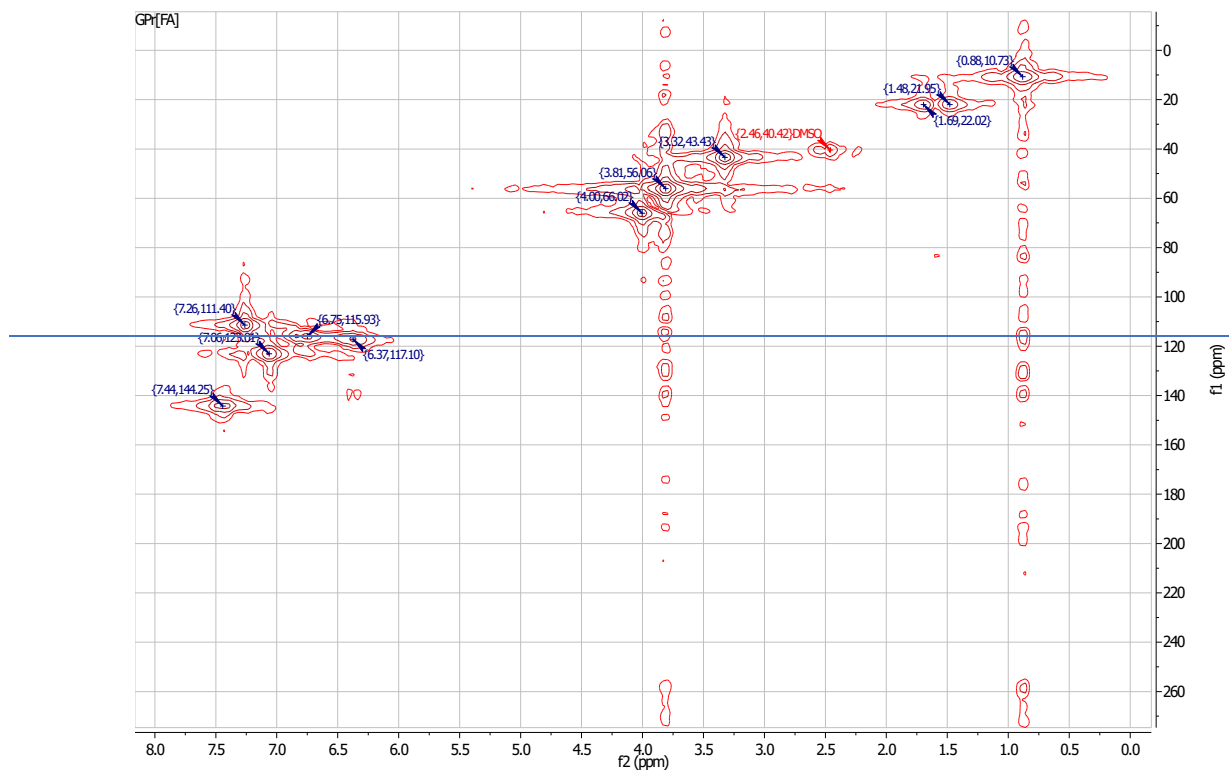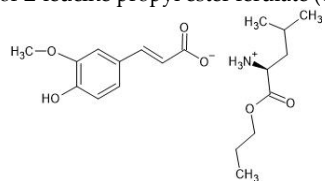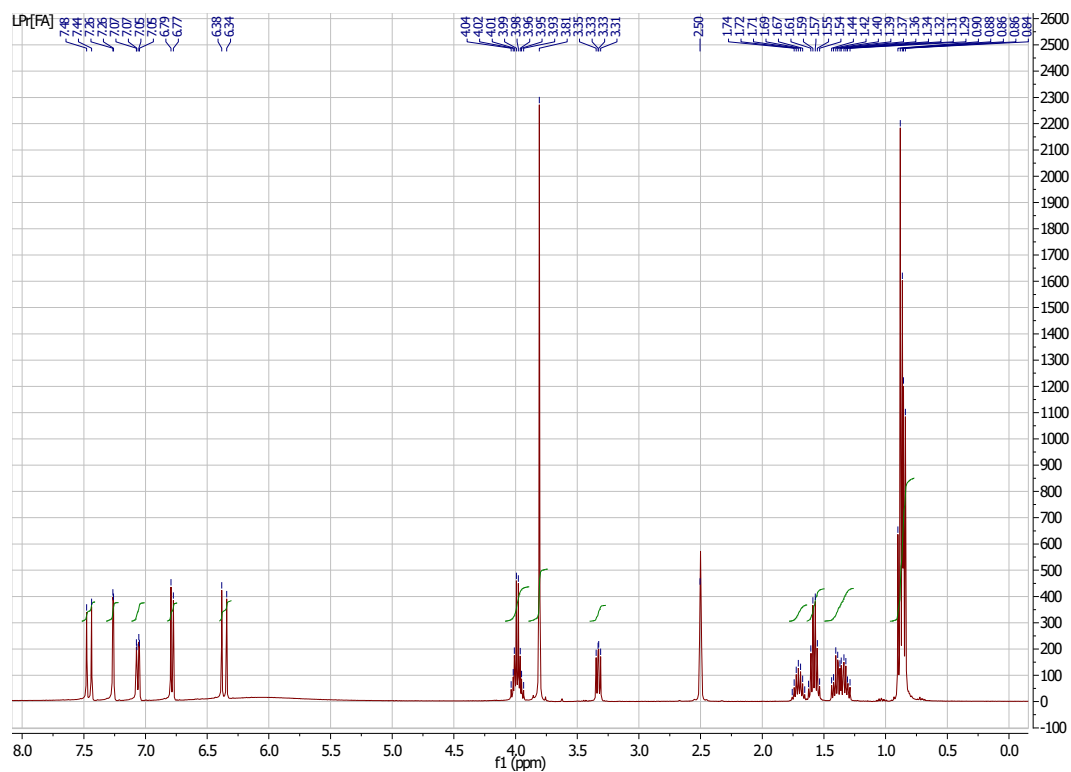

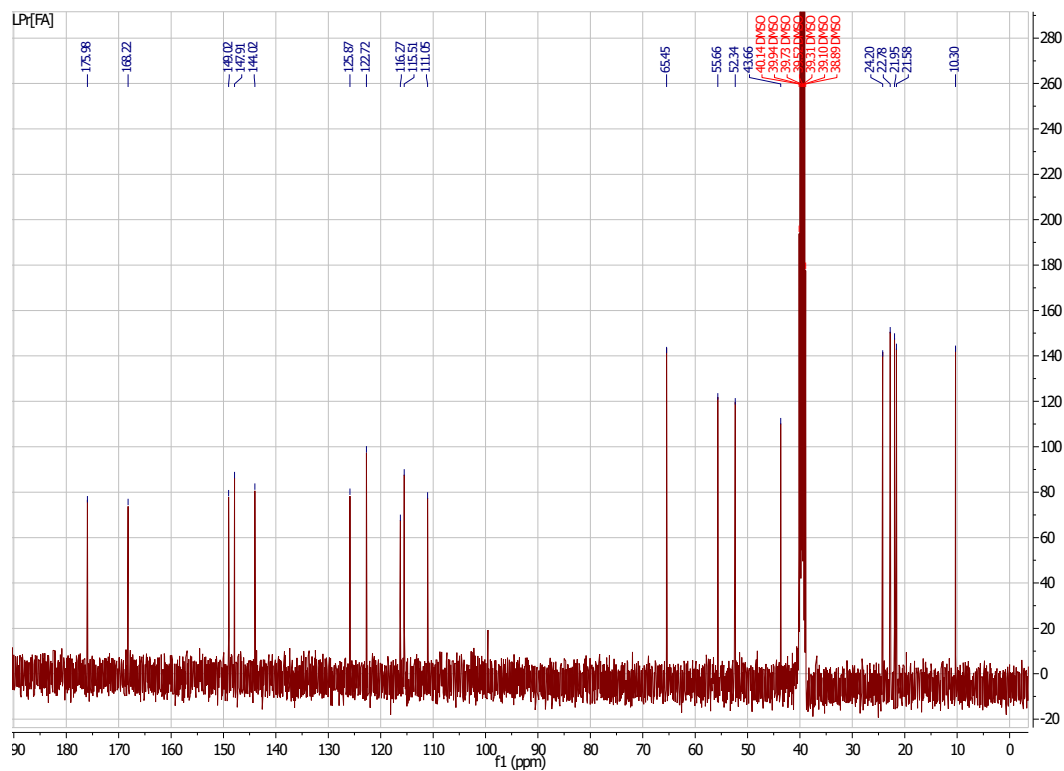

<sup>1</sup>H-<sup>13</sup>C HMQC spectrum of L-leucine propyl ester ferulate

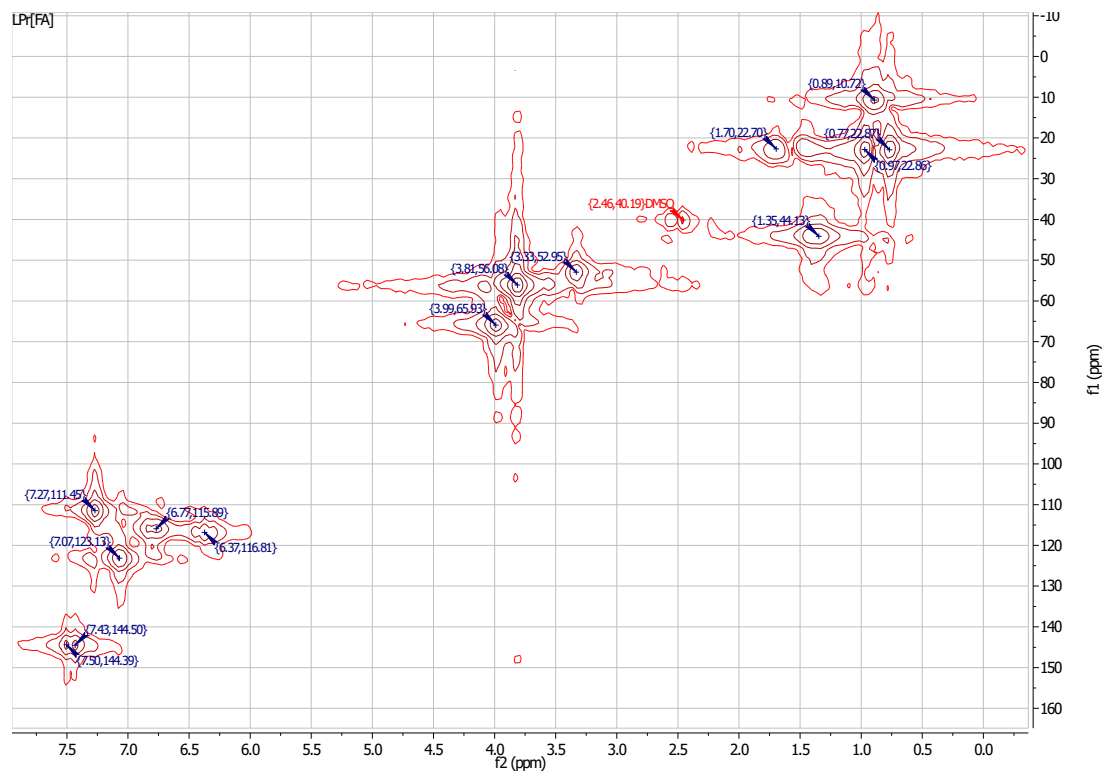

<sup>1</sup>H NMR spectrum of L-proline propyl ester ferulate (400 MHz, DMSO-*d*<sub>6</sub>)

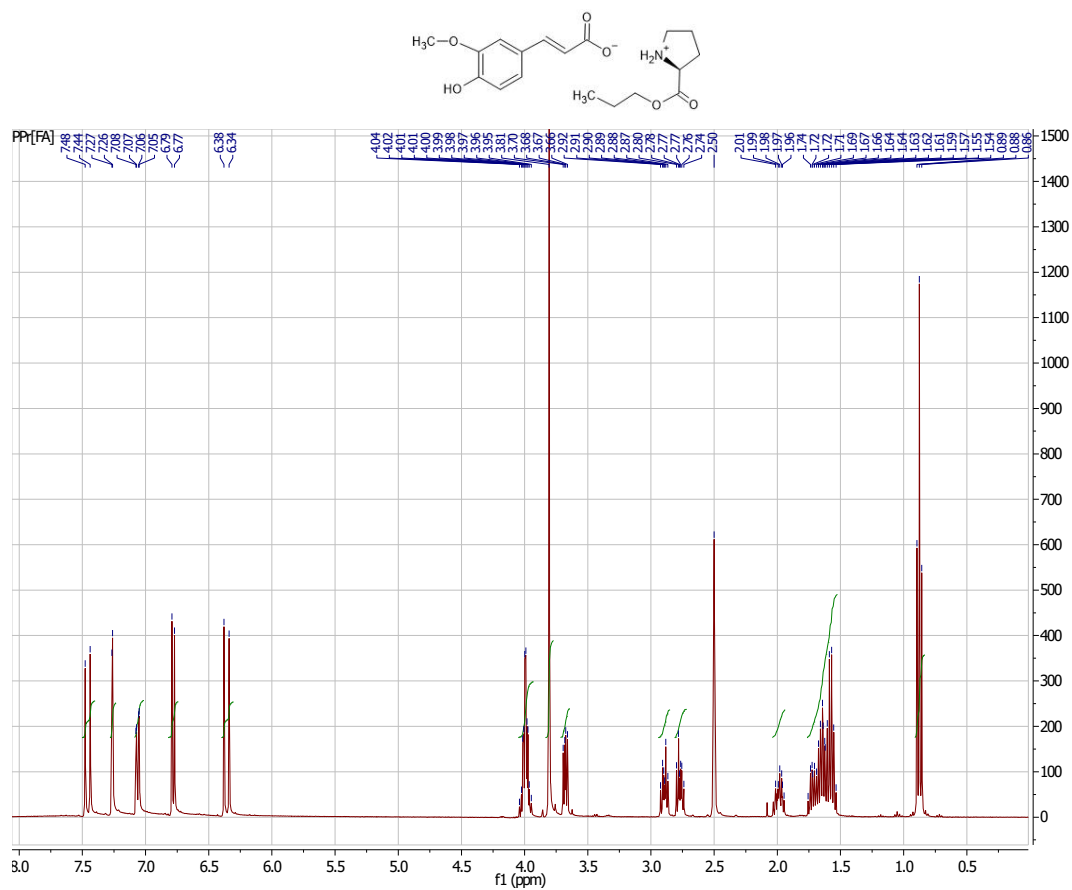

<sup>13</sup>C NMR spectrum of L-proline propyl ester ferulate (101 MHz, DMSO-*d*<sub>6</sub>)

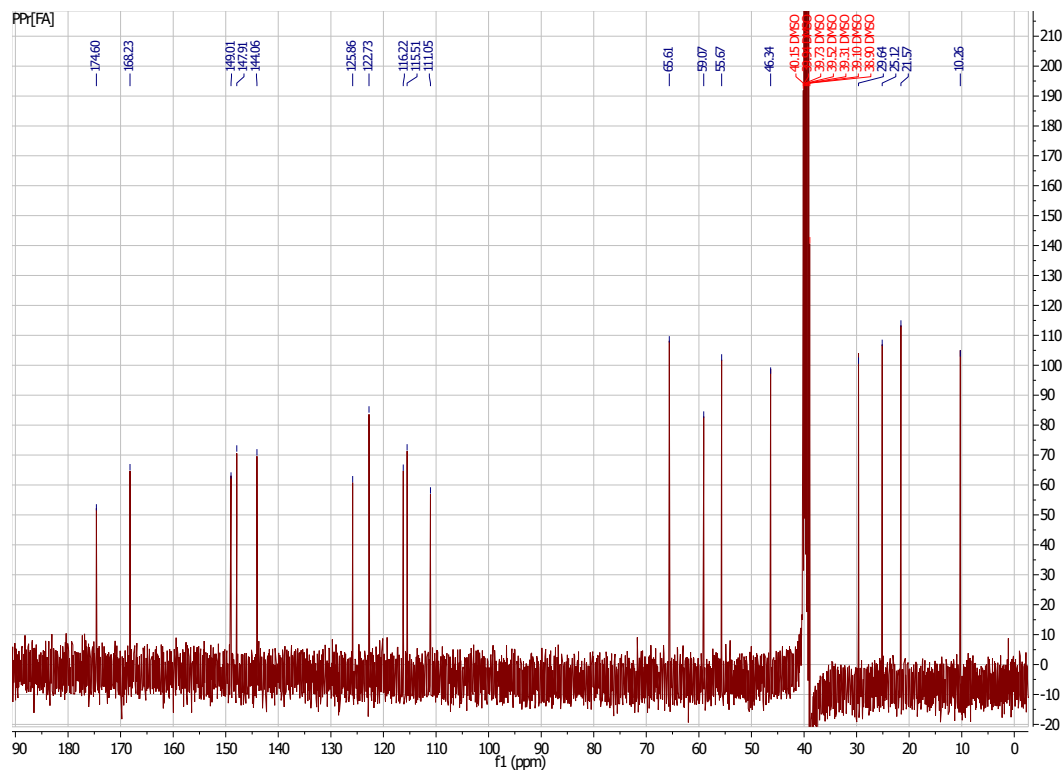 $^1\text{H}$ - $^{13}\text{C}$  HMQC spectrum of L-proline propyl ester ferulate

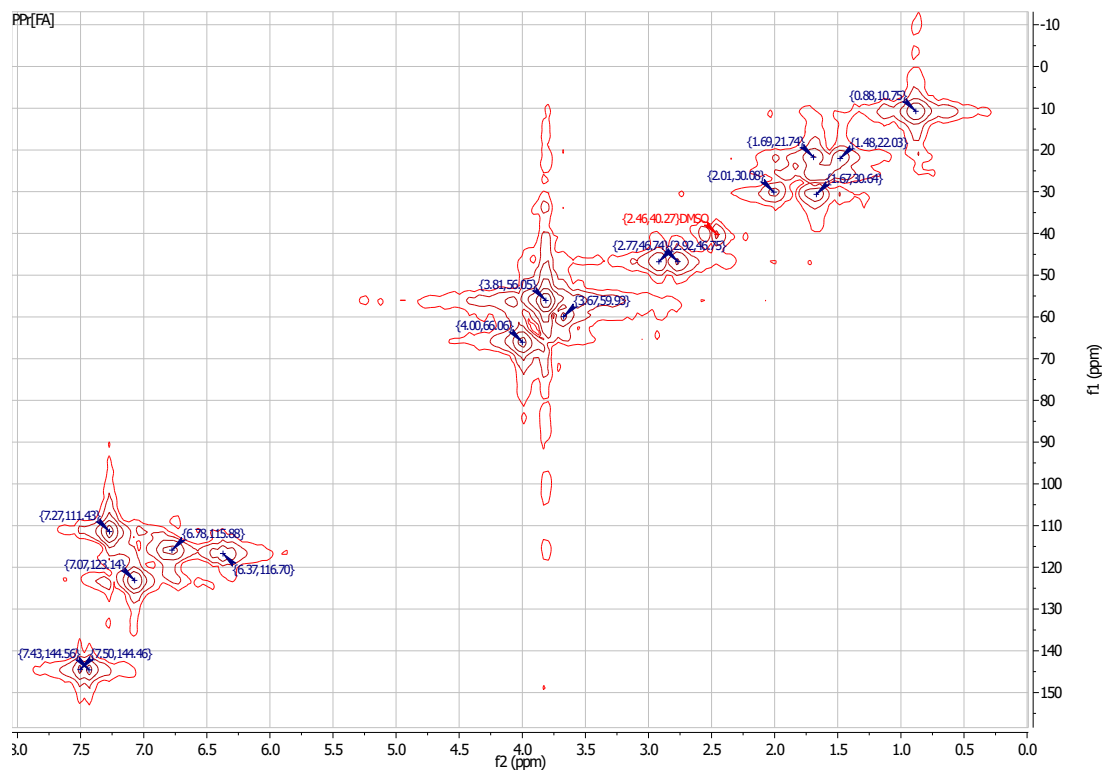

### S3. FTIR spectra of ferulic acid and amino acid propyl esters ferulates

FTIR spectrum of ferulic acid

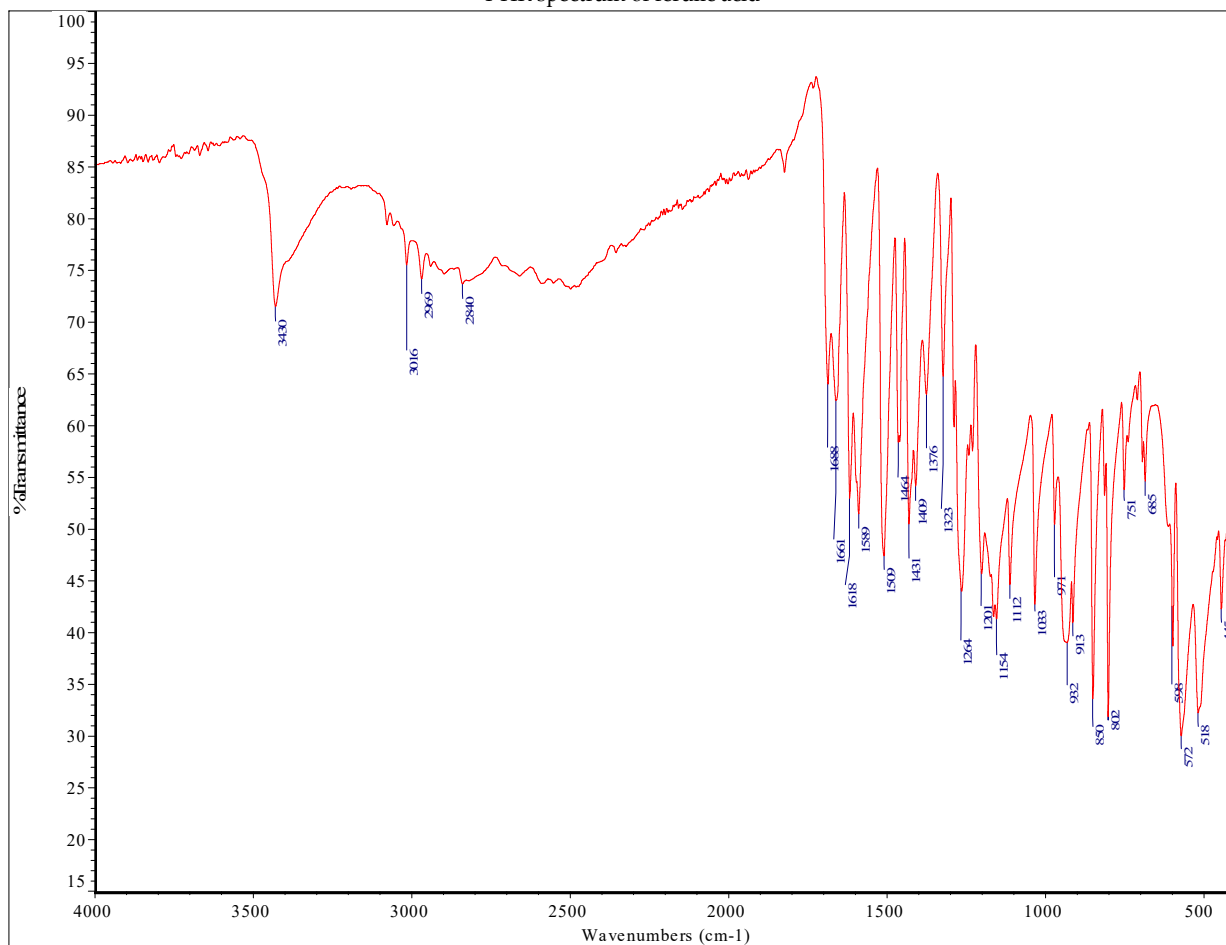

FTIR spectrum of glycine propyl ester ferulate, GPr[FA]

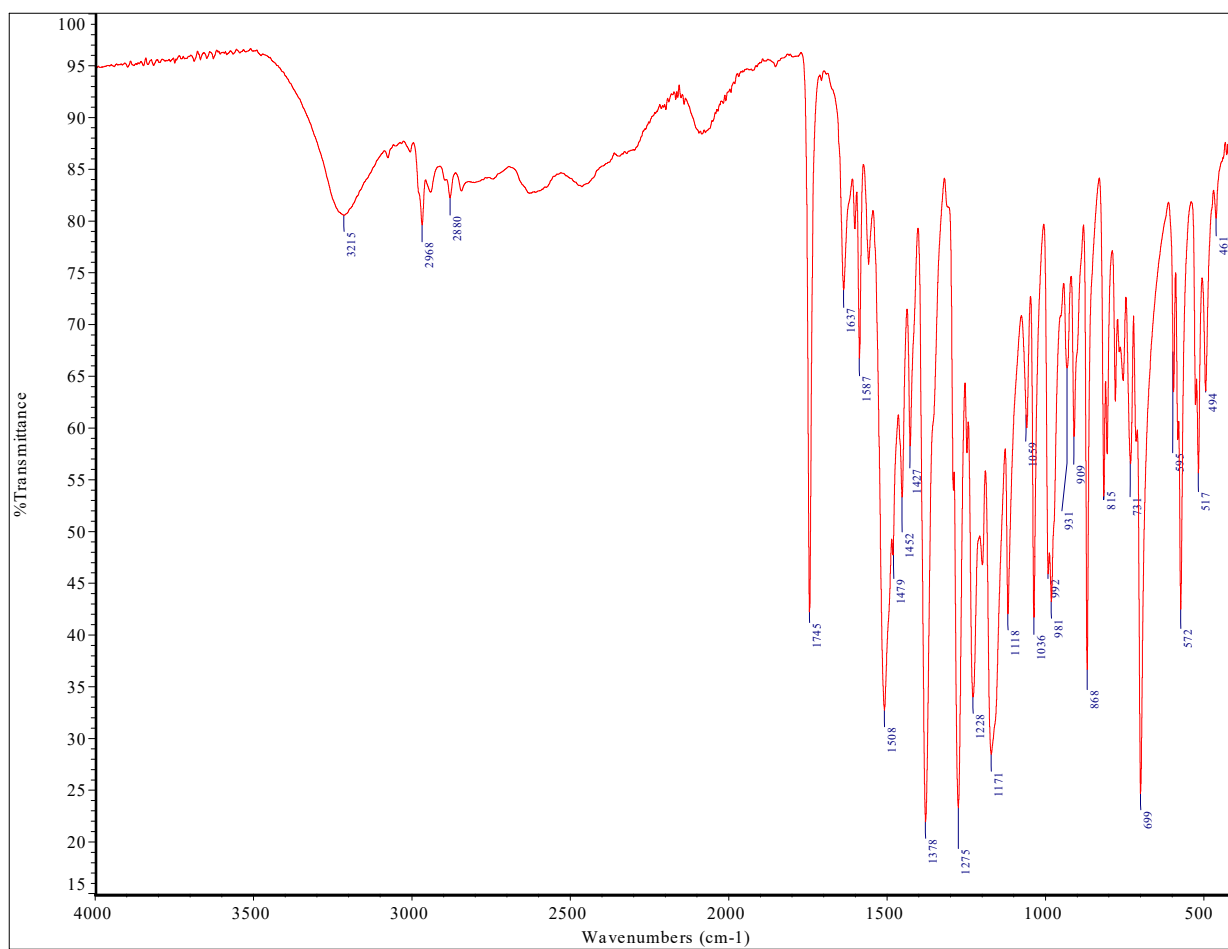

FTIR spectrum of L-leucine propyl ester ferulate, LPr[FA]



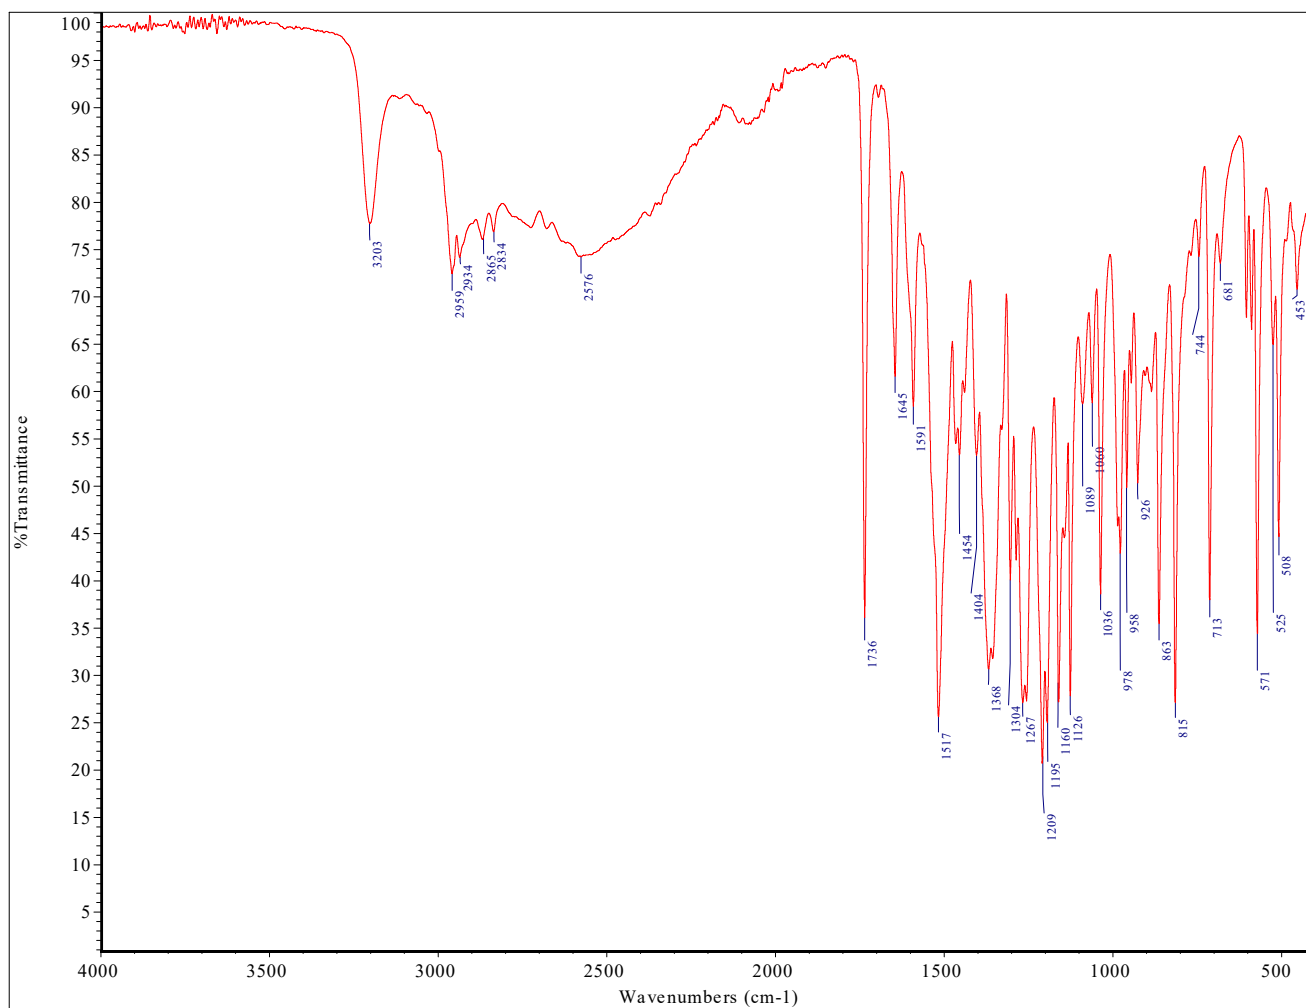

FTIR spectrum of L-proline propyl ester ferulate, PPr[FA]

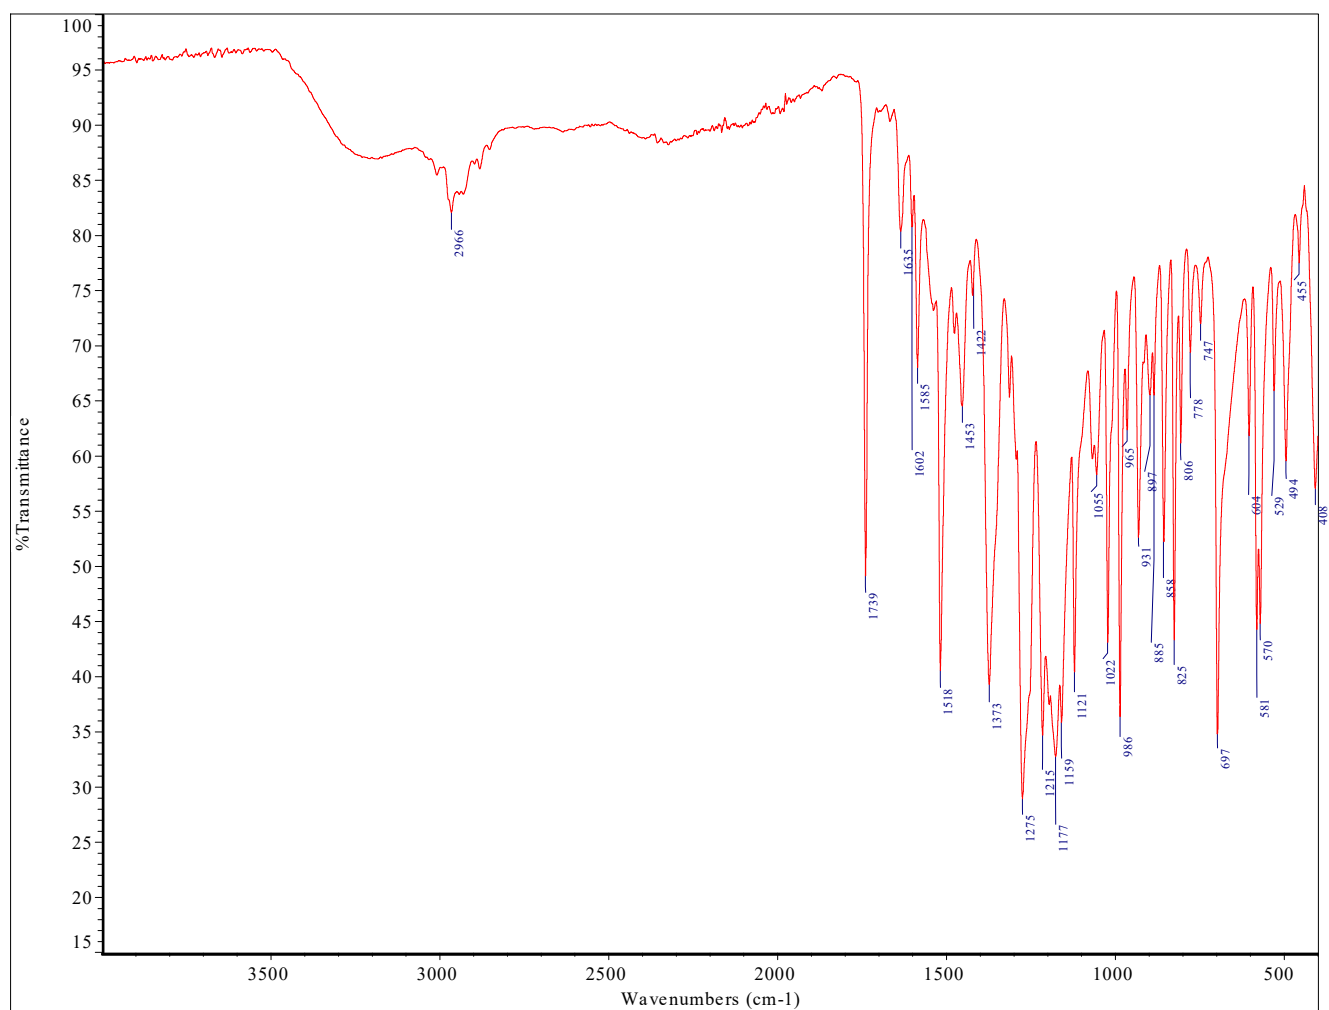

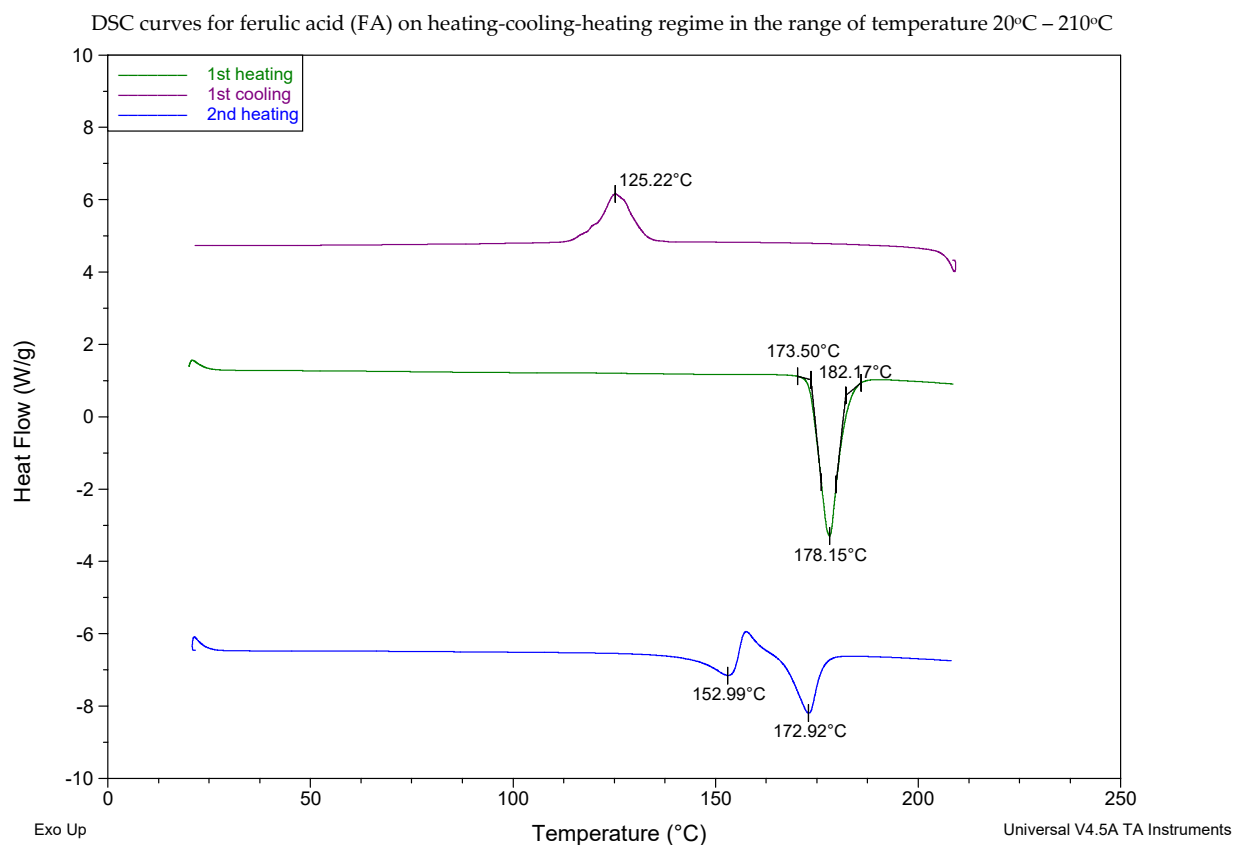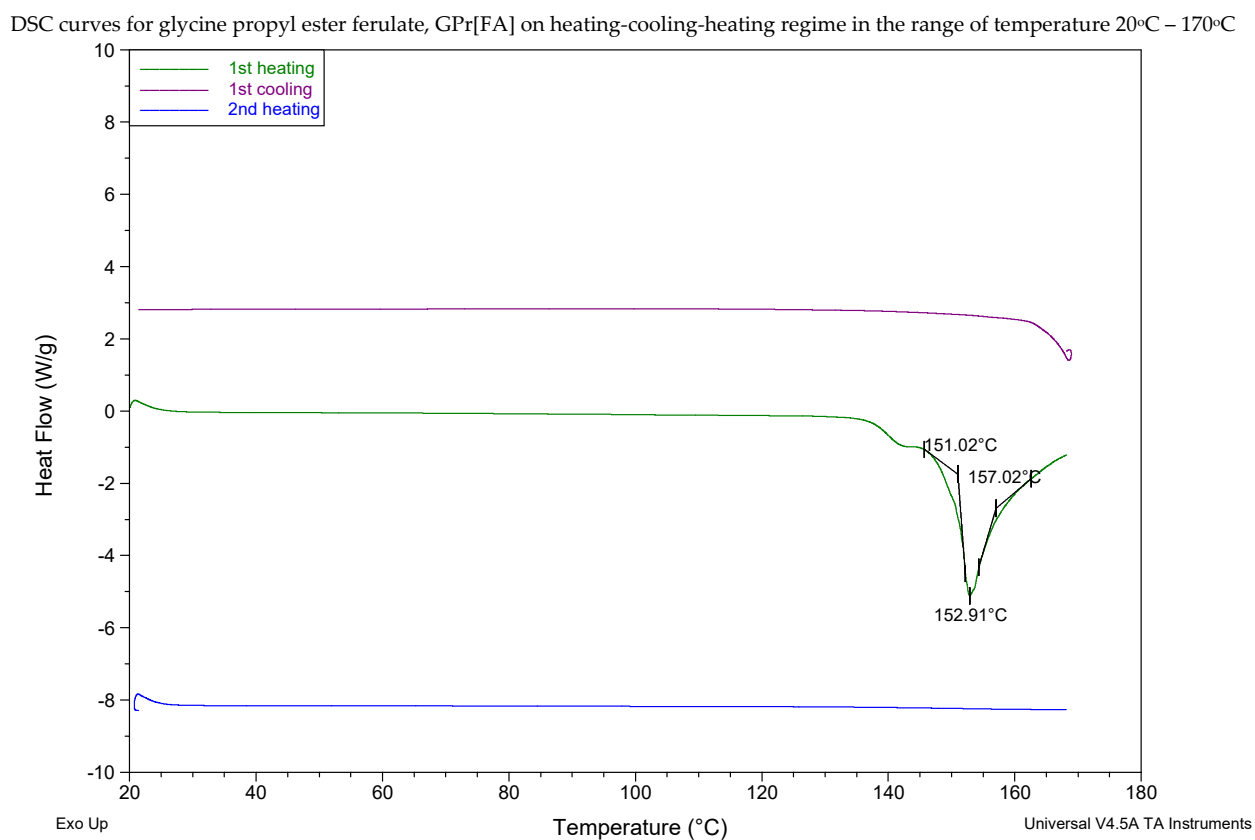

DSC curves for L-leucine propyl ester ferulate, LPr[FA] on heating-cooling-heating regime in the range of temperature 20°C – 140°C

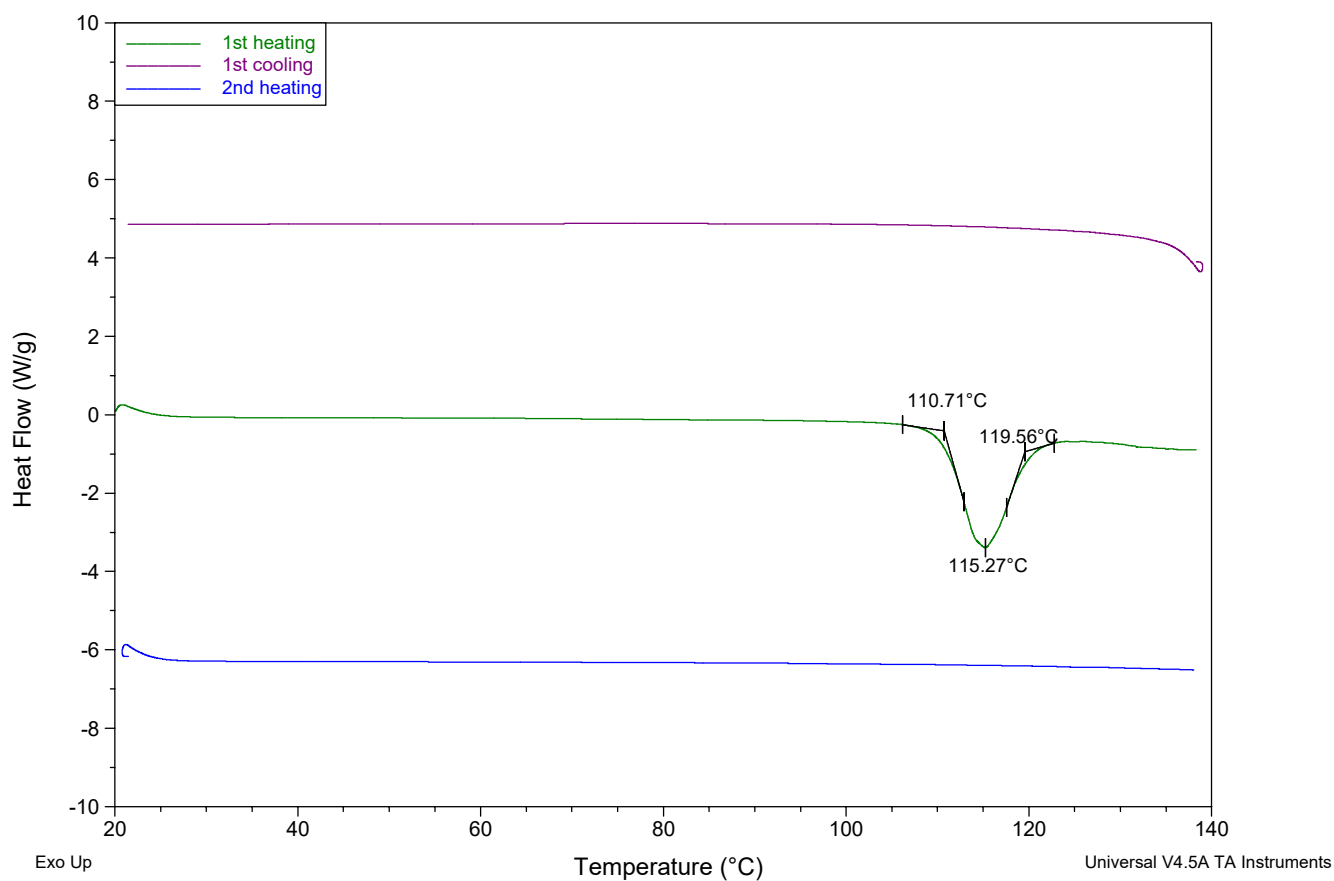

DSC curves for L-proline propyl ester ferulate, PPr[FA] on heating-cooling-heating regime in the range of temperature 20°C – 130°C

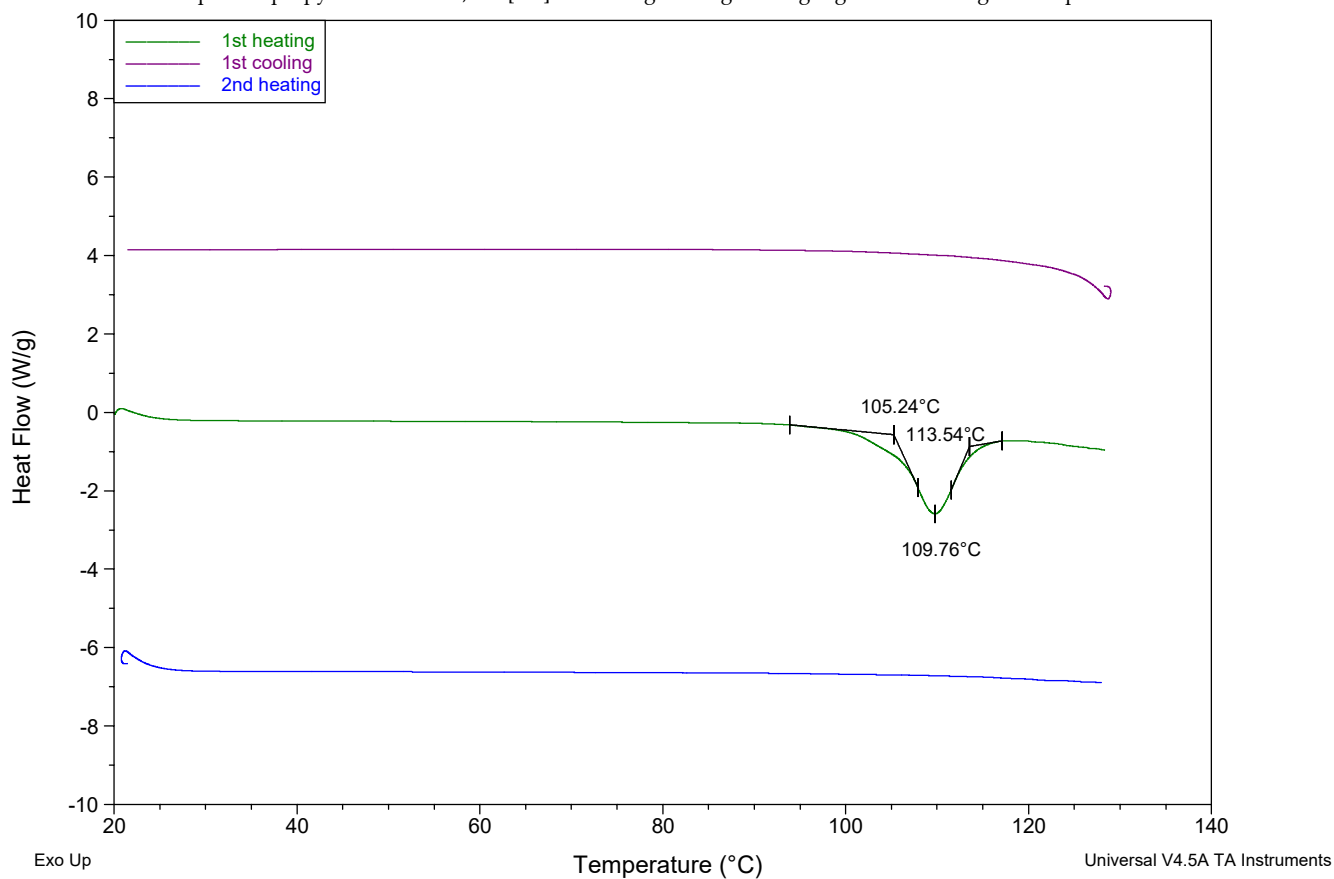

TG, DTG and c-DTA curves for ferulic acid

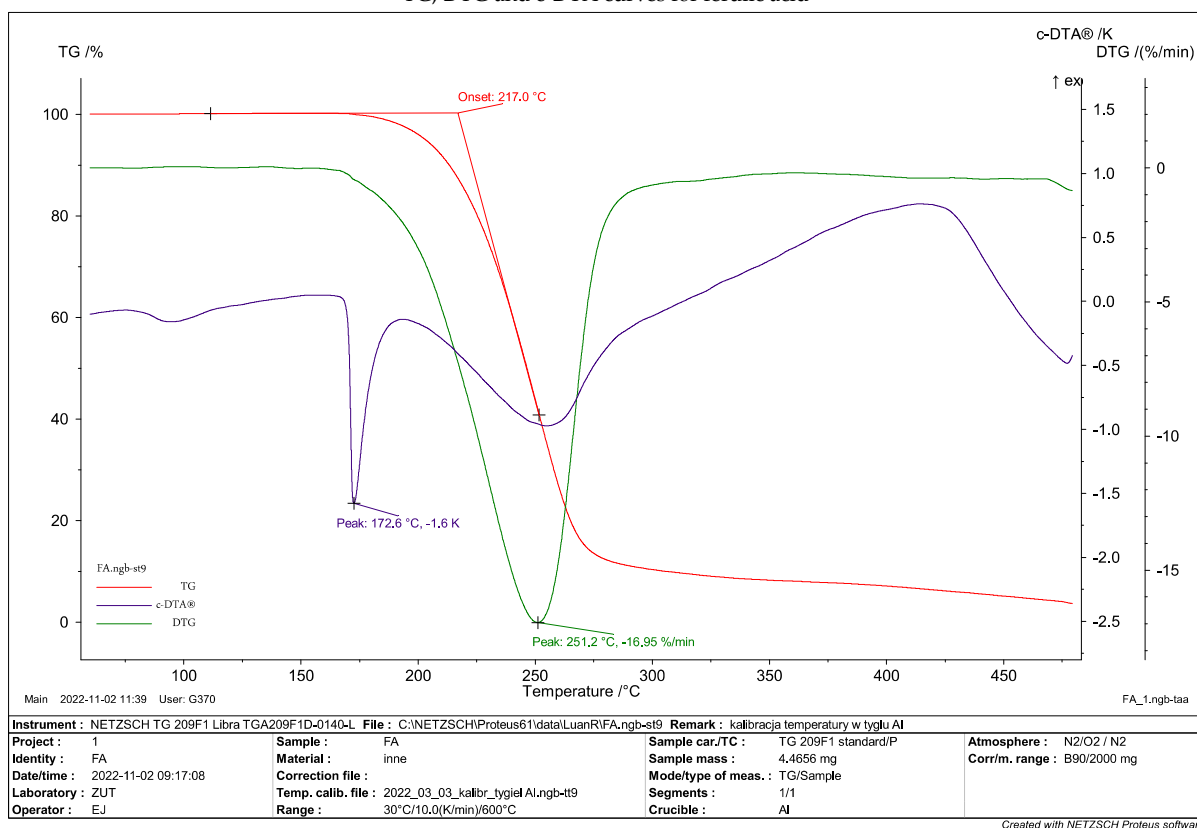

TG, DTG and c-DTA curves for glycine propyl ester ferulate

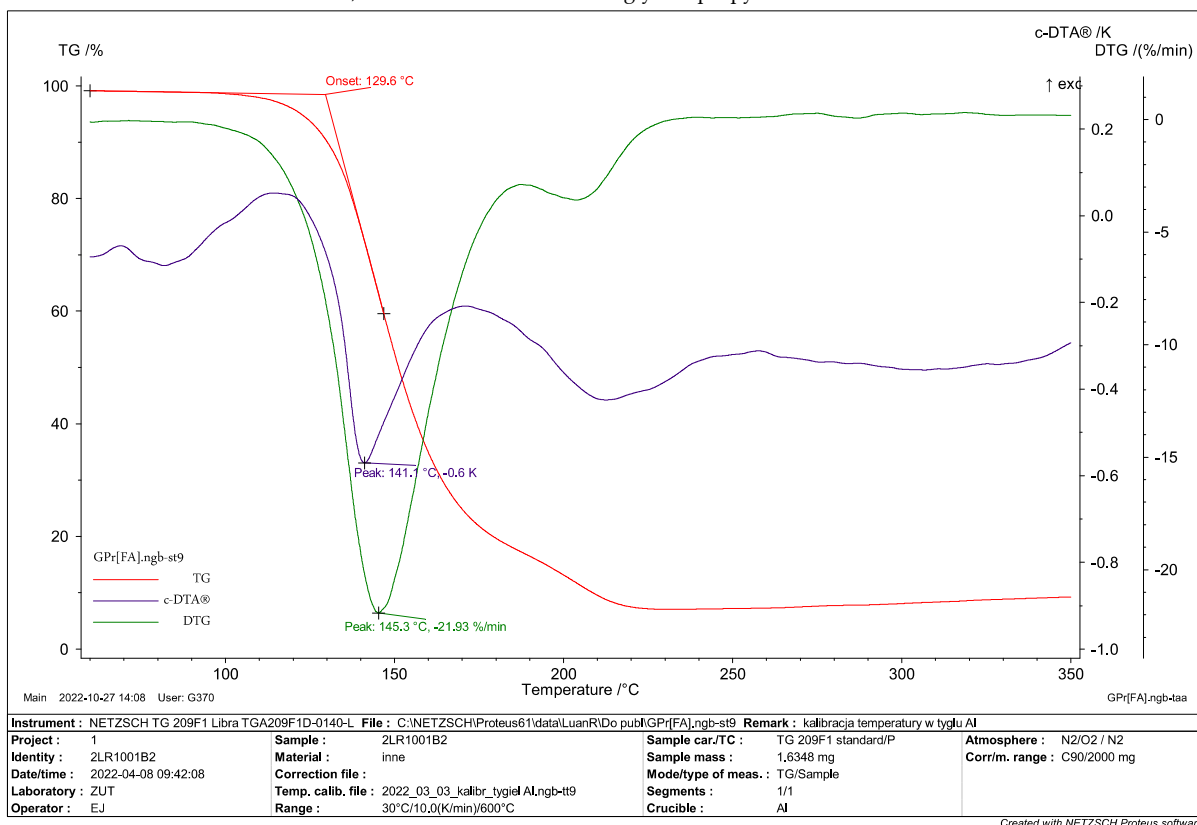

TG, DTG and c-DTA curves for L-leucine propyl ester ferulate

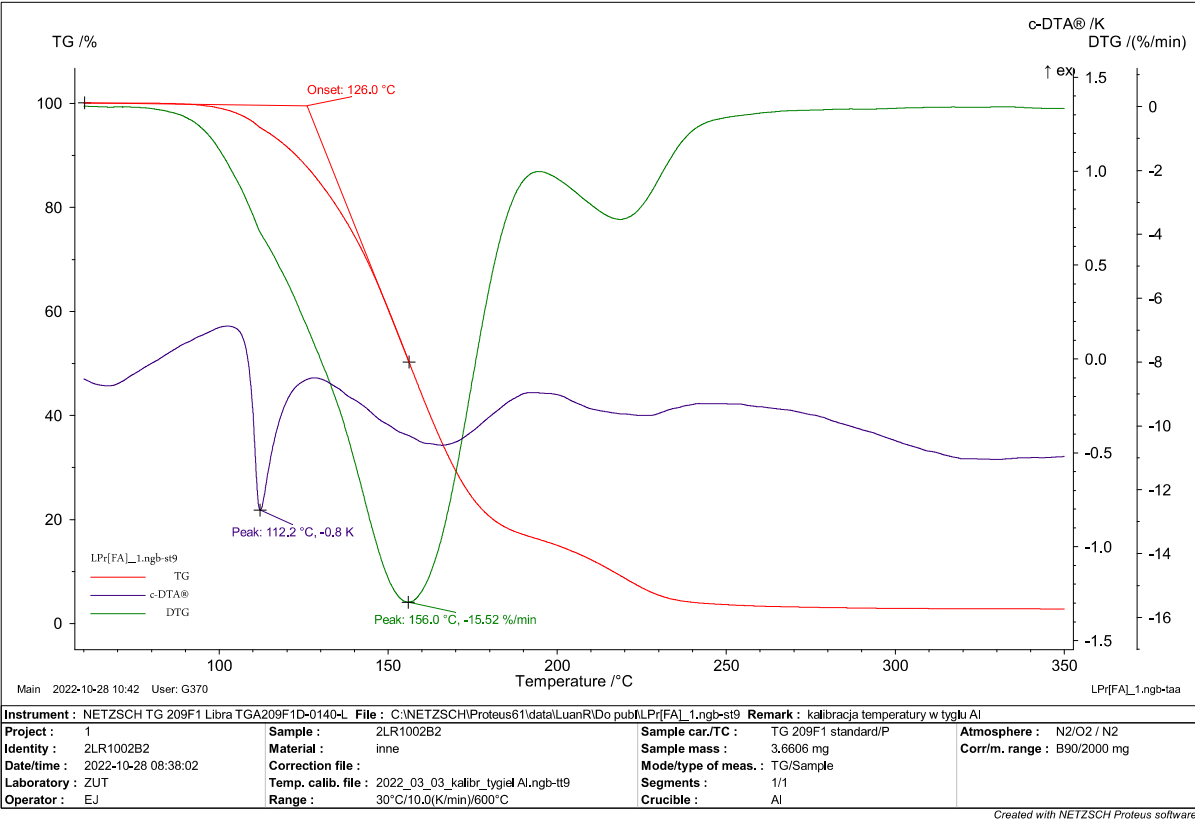

TG, DTG and c-DTA curves for L-proline propyl ester ferulate

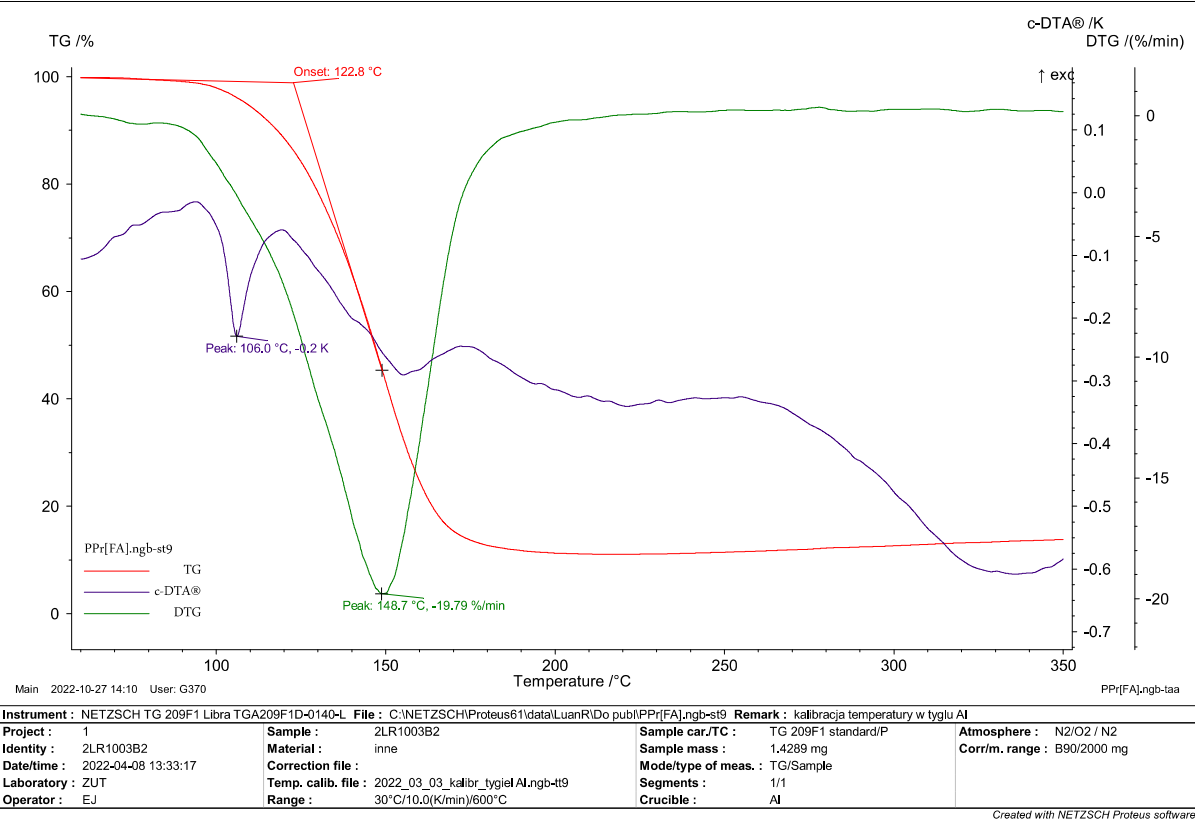

S6. Photographs of hydrogels and emulsions preparations

Emulsions and hydrogels used in the permeation test.

**A:** the emulsions: 0 – emulsion vehicle (without FA and its derivatives), 1 - E-FA; 2 - GPr[FA], 3 - LPr[FA] and 4 - PPr[FA];  
**B:** the hydrogels: 0 – hydrogel vehicle (without FA and its derivatives), 1 - H-FA; 2-GPr[FA], 3 - LPr[FA] and 4 - PPr[FA].

The photographs of the preparations were done prior applied to skin in the Franz chamber.

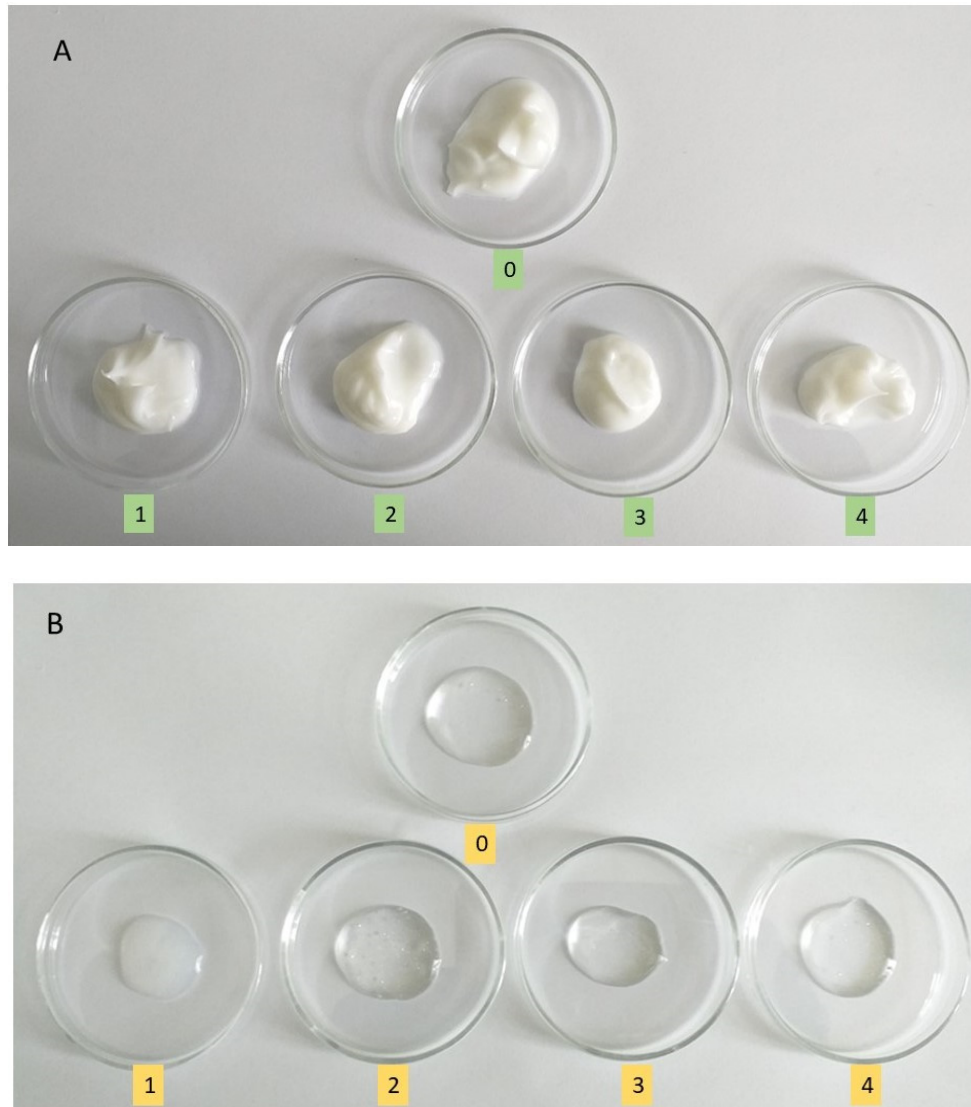

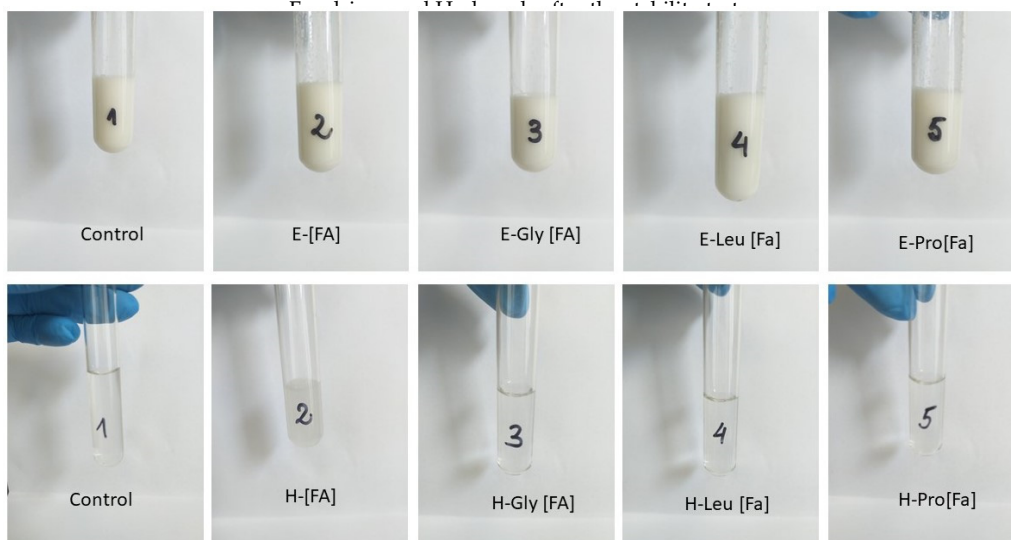

Supplement: s1 [file s1]
